# Supplementary material for: fPoxDB: fungal peroxidase database for comparative genomics
Source: PubMed Central journal article supplement (PMC4029949; doi:10.1186/1471-2180-14-117), 2014-05-08

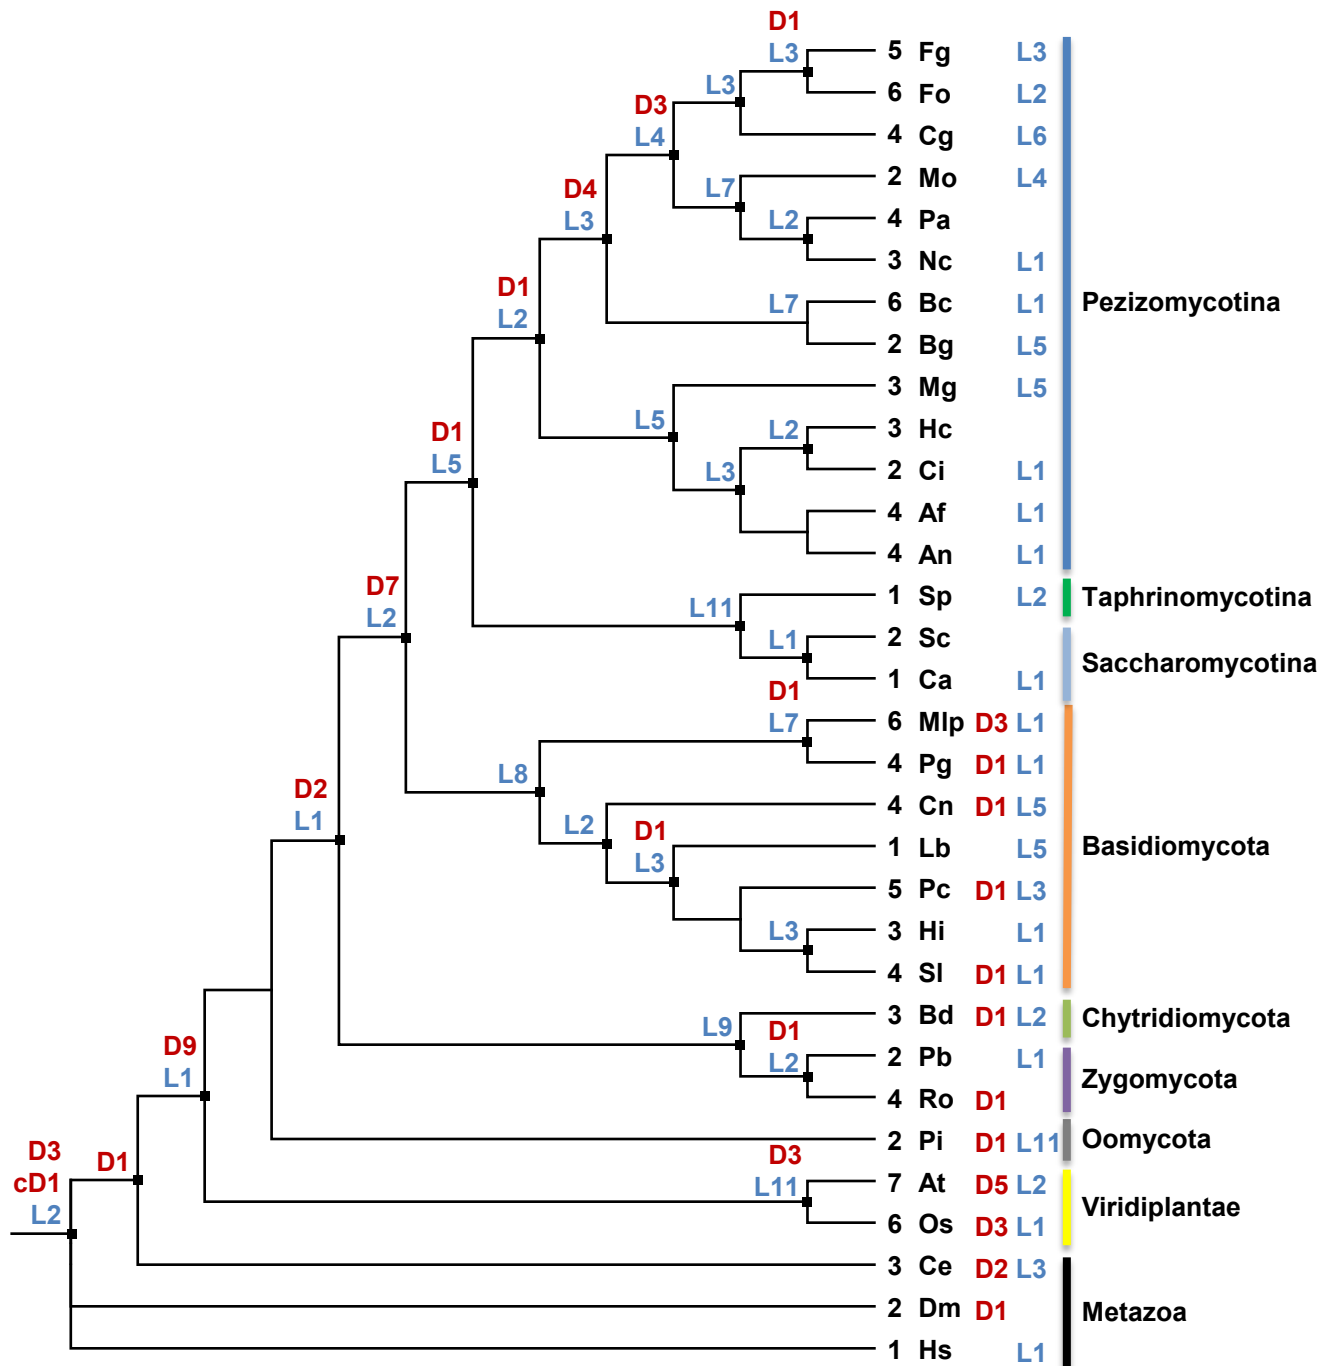

Supplement: 1471-2180-14-117-S2.pdf [file 1471-2180-14-117-S2.pdf]
